# Supplementary material
Source: publisher site journal article supplement (https://www.dovepress.com/article/565467)
Supplement: Supplementary file 1 [file 565467_Revised%20Supporting%20Information_1.docx]

Supporting Information

**Supplementary Figures:**


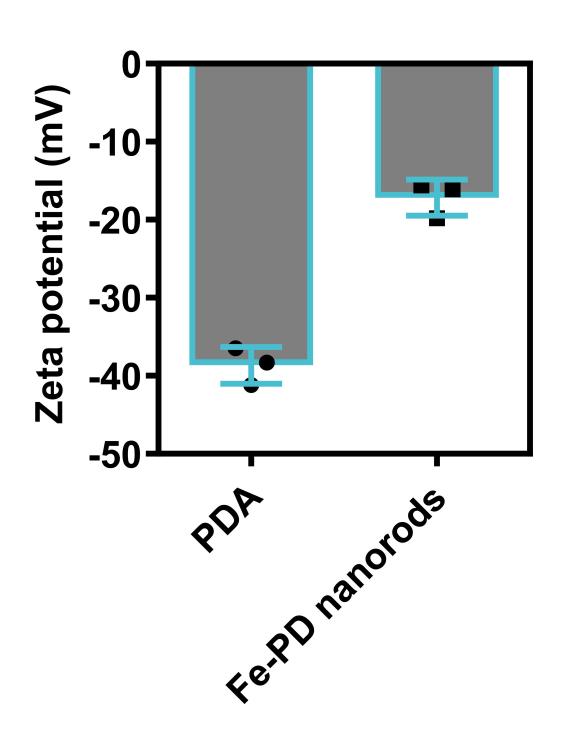


**Figure S1.** The zeta potential of PDA and Fe-PD nanorods.


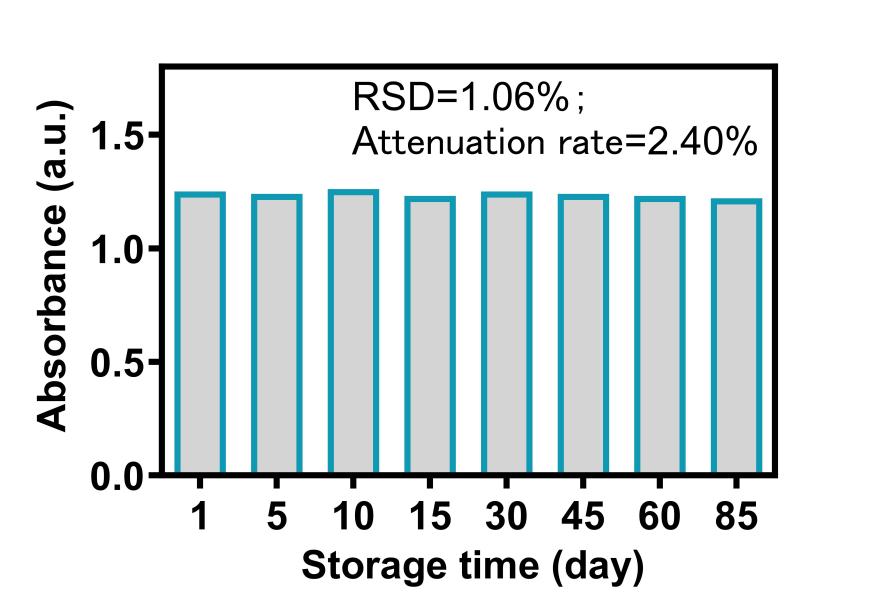


**Figure S2.** The long term catalytic stability of Fe-PDnanorods over time for 85 days.


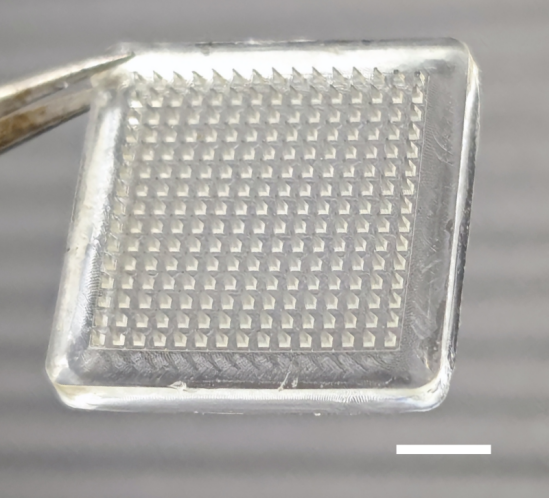


**Figure S3.** Photograph of the actual microneedle patch demolded for the PDMS mold. Scale bar, 3 mm.


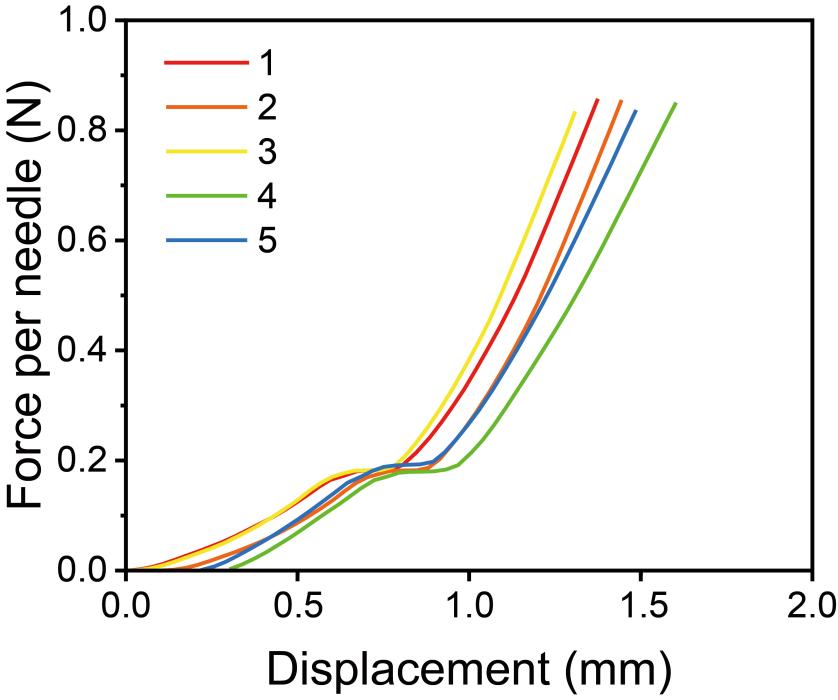


**Figure S4.** Curves of the loading fracture force versus displacement when 5 tests of compression experiments.


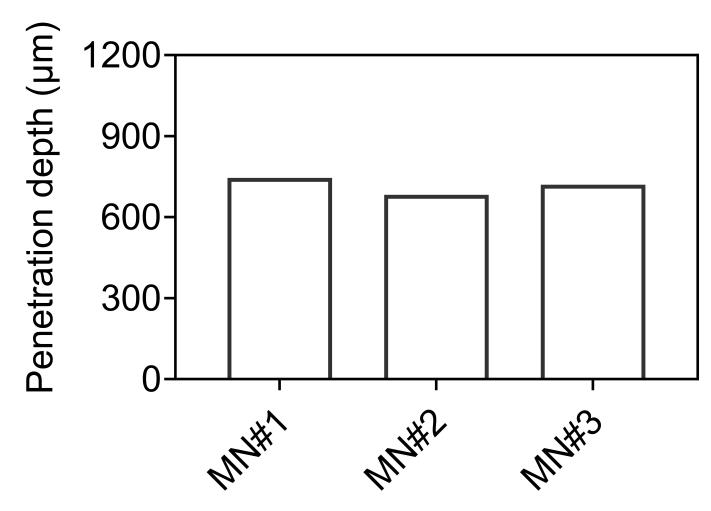


**Figure S5.** Penetration depths of three microneedle patches for pig skin. MN#1, MN#2, and MN#3 represent three repetitive tests of the MN patch.


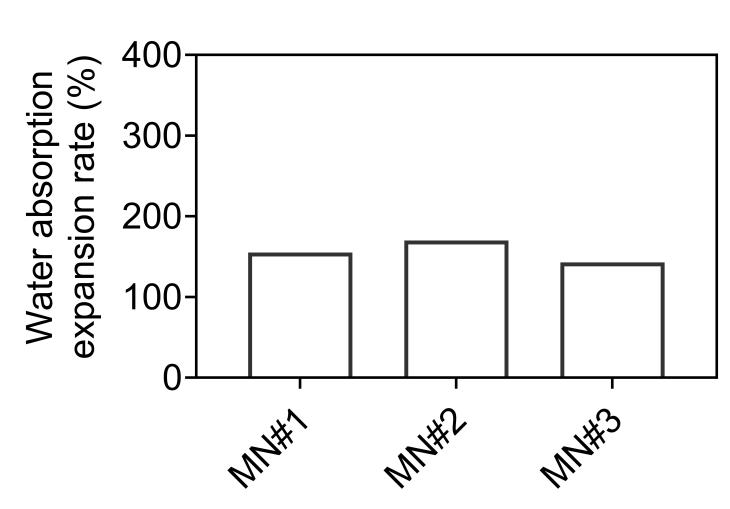


**Figure S6.** Water absorption expansion rate of three microneedle patches immersed in phosphate buffer solution (PBS, 10 mM, pH 7.4). MN#1, MN#2, and MN#3 represent three repetitive tests of the MN patch.


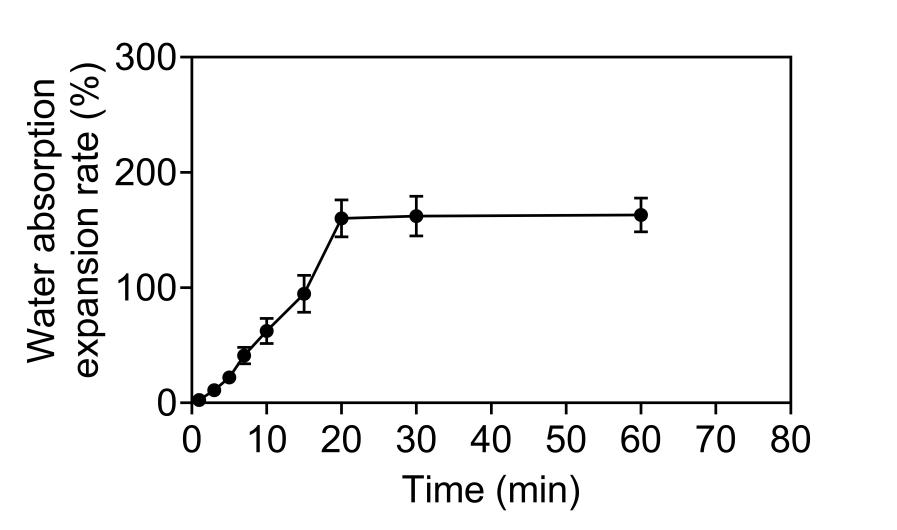


**Figure S7.** Water absorption expansion rate of the microneedle patch over time immersed in artificial interstitial fluid (AISF).


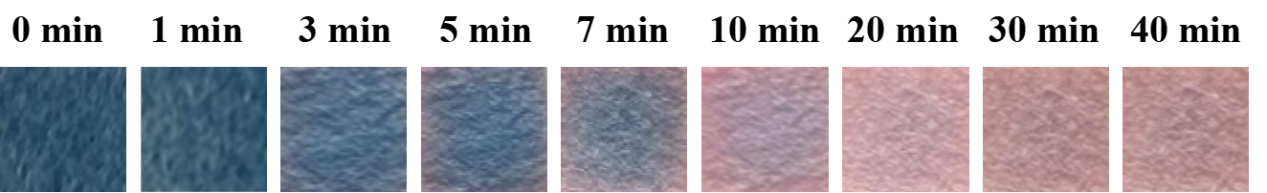


**Figure S8.** Photographs of color changes of the microneedle patches containing a colorimetric indicator (CoCl2) upon interaction with the extracted AISF from pig skin.


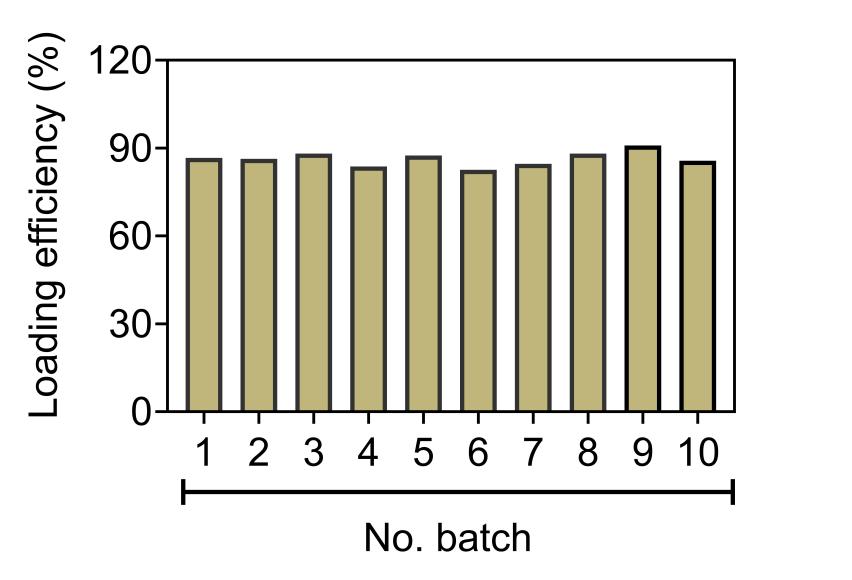


**Figure S9.** The nanozyme loading efficicency of MN-based Colorisensors for each bath. n=10.


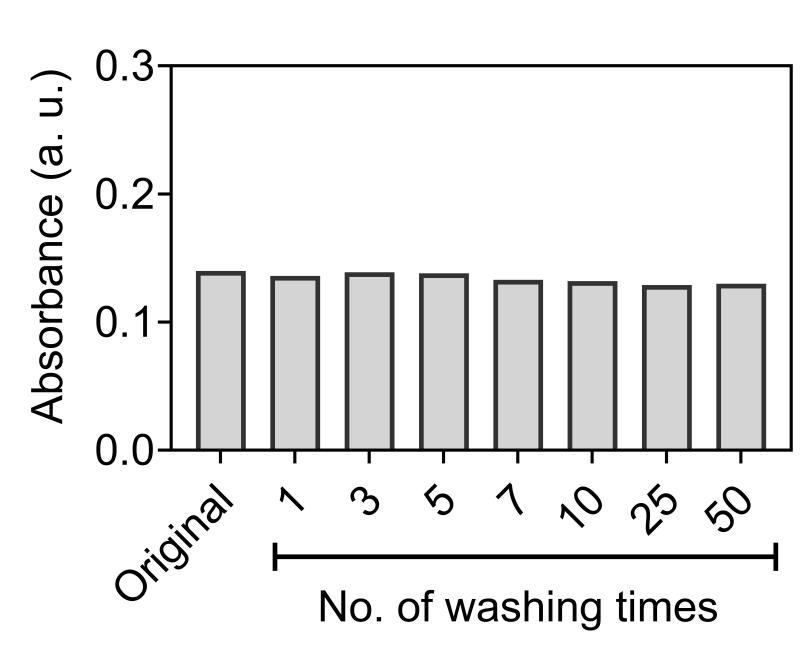


**Figure S10.** Absorbance values at 652 nm after continuous washing tests of the developed Colorisensor. Original represents a control testing with no washing treatment.


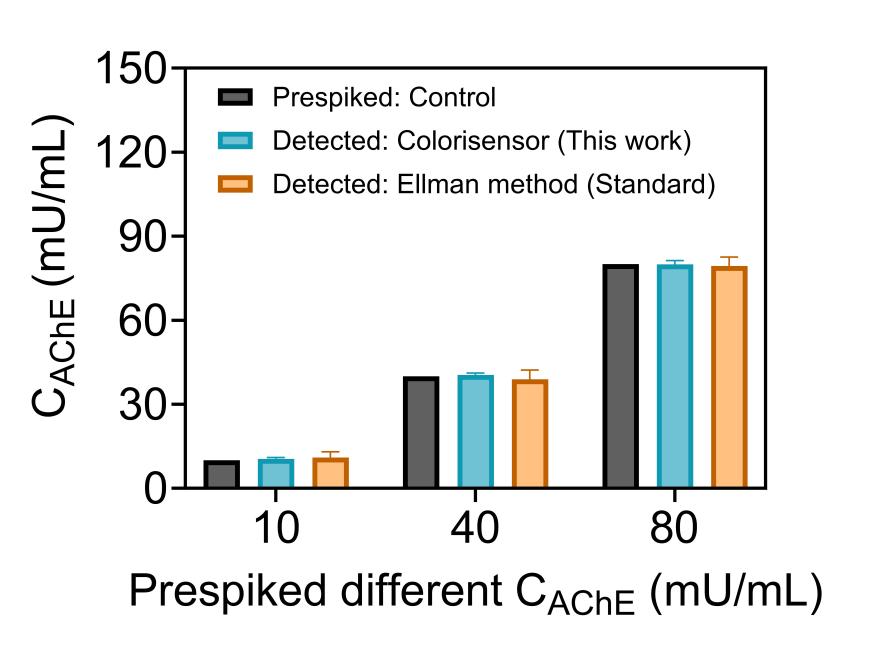


**Figure S11.** AChE concentrations (CAChE) in AISF prespiked by Control (as added original concentrations) and detected by the developed Colorisensor (This work) and the Ellman method as the standard method.

**Supplementary Tables:**

**Table S1.** EDS characterization of the Fe-PD nanoenzyme for element analysis

| Element | Wt% |
| --- | --- |
| C | 77.9 |
| N | 3.6 |
| O | 12.5 |
| Fe | 6.0 |

**Table S2.** Comparison of the apparent Michaelis-Menten constant (Km) and maximum reaction rate (Vmax) of Fe-PD with those of previously reported nanozymes using TMB as the substrate.

| Nanozymes | Km (mM) | Vmax (10-8 M S-1) | Ref. |
| --- | --- | --- | --- |
| Fe-NDs | 0.76 | 2.27 | [1] |
| KFePW12O40 | 0.35 | 3.70 | [2] |
| CF@CuAl-LDH | 4.40 | 0.59 | [3] |
| CB-CQDs | 0.83 | 5.13 | [4] |
| Zn-CuO | 10.0 | 2.88 | [5] |
| ZIF-67 | 13.69 | 0.35 | [6] |
| **Fe-PD** | **0.85** | **15.38** | **This work** |

Fe-PD nanozymes present Iron (III)-polydopamine nanorods prepared in this work.

0.85 presents Michaelis constant (Km, mM) of Fe-PD nanozymes prepared in the steady-state kinetic parameter analysis when using TMB as the substrate.

15.38 presents maximum reaction rate (Vmax, 10-8 M S-1) of Fe-PD nanozymes prepared in the steady-state kinetic parameter analysis when using TMB as the substrate.

**Table S3.** Comparison of the apparent Michaelis-Menten constant (Km) and maximum reaction rate (Vmax) of PFe-PD with those of previously reported nanozymes using H2O2 as the substrate.

| Nanozymes | Km (mM) | Vmax (10-8 M S-1) | Ref. |
| --- | --- | --- | --- |
| Fe-NDs | 0.87 | 3.76 | [1] |
| KFePW12O40 | 165 | 6.90 | [2] |
| CF@CuAl-LDH | 1.48 | 0.29 | [3] |
| CB-CQDs | 0.70 | 4.69 | [4] |
| Zn-CuO | 71 | 0.30 | [5] |
| ZIF-67 | 3.52 | 0.28 | [6] |
| **Fe-PD** | **0.24** | **9.16** | **This work** |

Fe-PD nanozymes present Iron (III)-polydopamine nanorods prepared in this work.

0.24 presents Michaelis constant (Km) of Fe-PD nanozymes prepared in the steady-state kinetic parameter analysis when using H2O2 as the substrate.

9.16 presents maximum reaction rate (Vmax) of Fe-PD nanozymes prepared in the steady-state kinetic parameter analysis when using H2O2 as the substrate.

**Table S4.** Comparison of performance parameters of the conventional and developed detection methods for AChE determination.

| Detection methods | Detection Range (mU/mL) | LOD (mU/mL) | Ref. |
| --- | --- | --- | --- |
| Ellman assay | 0-83 | / | [7] |
| Colorimetric assay | 200-1500 | 200 | [8] |
| Fluorescence assay | 0-30 | 0.03 | [9] |
| Colorimetric assay | 0.54-3.93 | 0.029 | [10] |
| Multicolor assay | 0.01–500 | 0.0074 | [11] |
| Colorimetric assay | 0.1-30 | 0.066 | [12] |
| Colorisensor | 0.01-1000 | 0.007 | This work |

**References:**

1. Li, C.; Zeng, J.; Guo, D.; Liu, L.; Xiong, L.; Luo, X.; Hu, Z.; Wu, F., Cobalt-doped carbon quantum dots with peroxidase-mimetic activity for ascorbic acid detection through both fluorometric and colorimetric methods. *ACS Appl. Mater. Interfaces* **2021,** 13, 49453-49461.

2. Liu, X.; Wang, X.; Qi, C.; Han, Q.; Xiao, W.; Cai, S.; Wang, C.; Yang, R., Sensitive colorimetric detection of ascorbic acid using Pt/CeO2 nanocomposites as peroxidase mimics. *Appl. Surf. Sci.* **2019,** 479, 532-539.

3. Chen, S.; Chi, M.; Yang, Z.; Gao, M.; Wang, C.; Lu, X., Carbon dots/Fe3O4 hybrid nanofibers as efficient peroxidase mimics for sensitive detection of H2O2 and ascorbic acid. *Inorg. Chem. Front.* **2017,** 4, 1621-1627.

4. Yadav, P. K.; Singh, V. K.; Chandra, S.; Bano, D.; Kumar, V.; Talat, M.; Hasan, S. H., Green synthesis of fluorescent carbon quantum dots from Azadirachta indica leaves and their peroxidase-mimetic activity for the detection of H2O2 and ascorbic acid in common fresh fruits. *ACS Biomater. Sci. Eng.* **2019,** 5, 623-632.

5. Isho, R. D.; Mohammad, N. S. M.; Omer, K. M., Synthesis of MnO2 sub-microspheres with effective oxidase-mimicking nanozymes for the colorimetric assay of ascorbic acid in orange fruits and juice. *New J. Chem.* **2023,** 47, 7800-7809.

6. Dadakhani, S.; Dehghan, G.; Khataee, A., A robust and facile label-free method for highly sensitive colorimetric detection of ascorbic acid in fresh fruits based on peroxidase-like activity of modified FeCo-LDH@WO3 nanocomposite. *Spectrochim. Acta, Part A* **2023,** 302, 123016.

7. Ellman, G. L.; Courtney, K. D.; Andres, V., Jr.; Feather-Stone, R. M., A new and rapid colorimetric determination of acetylcholinesterase activity. *Biochem. Pharmacol.* **1961,** 7, 88-95.

8. Li, Y.; Bai, H.; Li, C.; Shi, G., Colorimetric assays for acetylcholinesterase activity and inhibitor screening based on the disassembly-assembly of a water-soluble polythiophene derivative. *ACS Appl. Mater. Interfaces* **2011,** 3, 1306-10.

9. Zhang, R.-L.; Liang, S.-S.; Jin, M.; He, T.; Zhang, Z.-Q., Simple and sensitive fluorescence assay for acetylcholinesterase activity detection and inhibitor screening based on glutathione-capped gold nanoclusters. *Sens. Actuators, B* **2017,** 253, 196-202.

10. Wang, Y.; Xue, Y.; Zhao, Q.; Wang, S.; Sun, J.; Yang, X., Colorimetric Assay for Acetylcholinesterase Activity and Inhibitor Screening Based on Metal-Organic Framework Nanosheets. *Anal. Chem.* **2022,** 94, 16345-16352.

11. Li, Y.; Chen, L.; Li, C. Y.; Zhang, J.; Zhao, Y.; Yang, Y. H.; Yang, T., Nanoplasmonic biosensors for multicolor visual analysis of acetylcholinesterase activity and drug inhibitor screening in point-of-care testing. *Biosens. Bioelectron.* **2024,** 247, 115912.

12. Mao, Y. W.; Zhang, J.; Zhang, R.; Li, J. Q.; Wang, A. J.; Zhou, X. C.; Feng, J. J., N-Doped Carbon Nanotubes Supported Fe-Mn Dual-Single-Atoms Nanozyme with Synergistically Enhanced Peroxidase Activity for Sensitive Colorimetric Detection of Acetylcholinesterase and Its Inhibitor. *Anal. Chem.* **2023,** 95, 8640-8648.
